# Supplementary material
Source: publisher figshare collection journal article supplement (https://gsajournals.figshare.com/ndownloader/files/17930522)
Supplement: Supplementary file 1 [file 17930522]

| **Table S3** Analyses of variance on olfactory behavioral responses of each selection group, relative to control. | | | | | |
| --- | --- | --- | --- | --- | --- |
| **Selected Odorant** | **Term** | **df** | **S.S.** | ***F*** | ***P*** |
| BUT | Selection | 2 | 5.2895 | 37.881 | **0.0001** |
|  | Line (Selection) | 6 | 0.2330 | 0.5563 | 0.7638 |
| CYC | Selection | 2 | 5.7867 | 53.604 | **0.0001** |
|  | Line (Selection) | 6 | 0.1887 | 0.5828 | 0.7432 |
| Degrees of freedom (df), Sum of Squares (S.S.), *F* ratio (*F*), and *P*-value (*P*). | | | | | |
| Significant terms in bold. | | | | | |
